# Supplementary figures and images for: Mechanistic investigation of the oxidation of hydrazides: implications for the activation of the TB drug isoniazid
Source: Royal Society of Chemistry journal article supplement (doi:10.1039/c2ob26419f), 2012-11-08

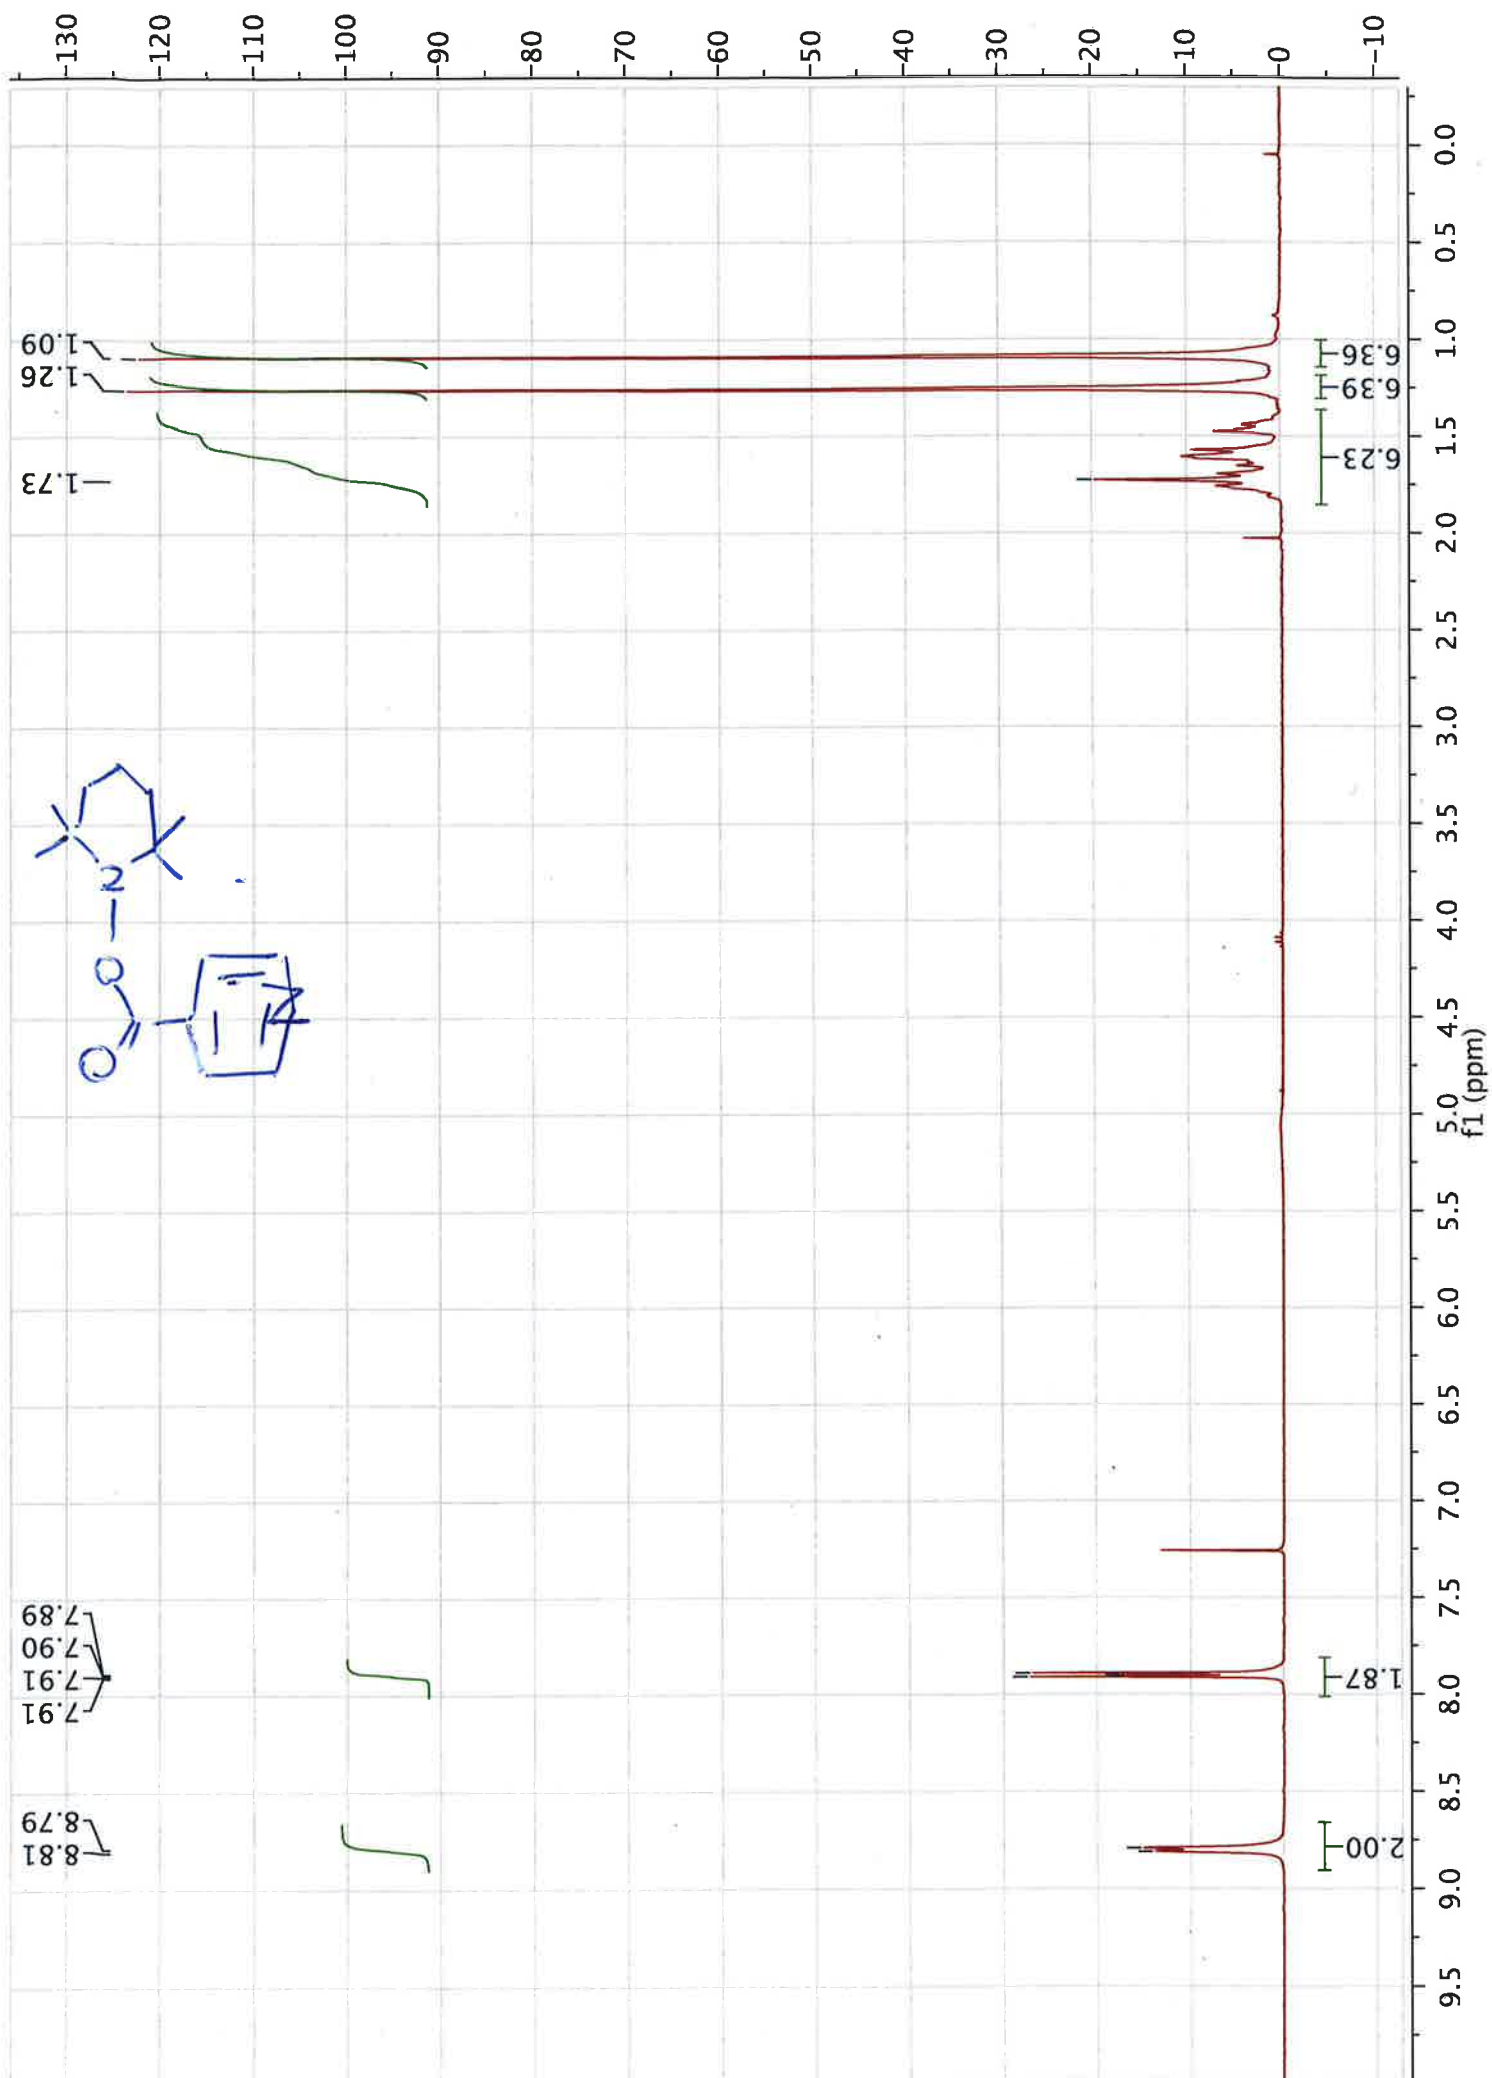

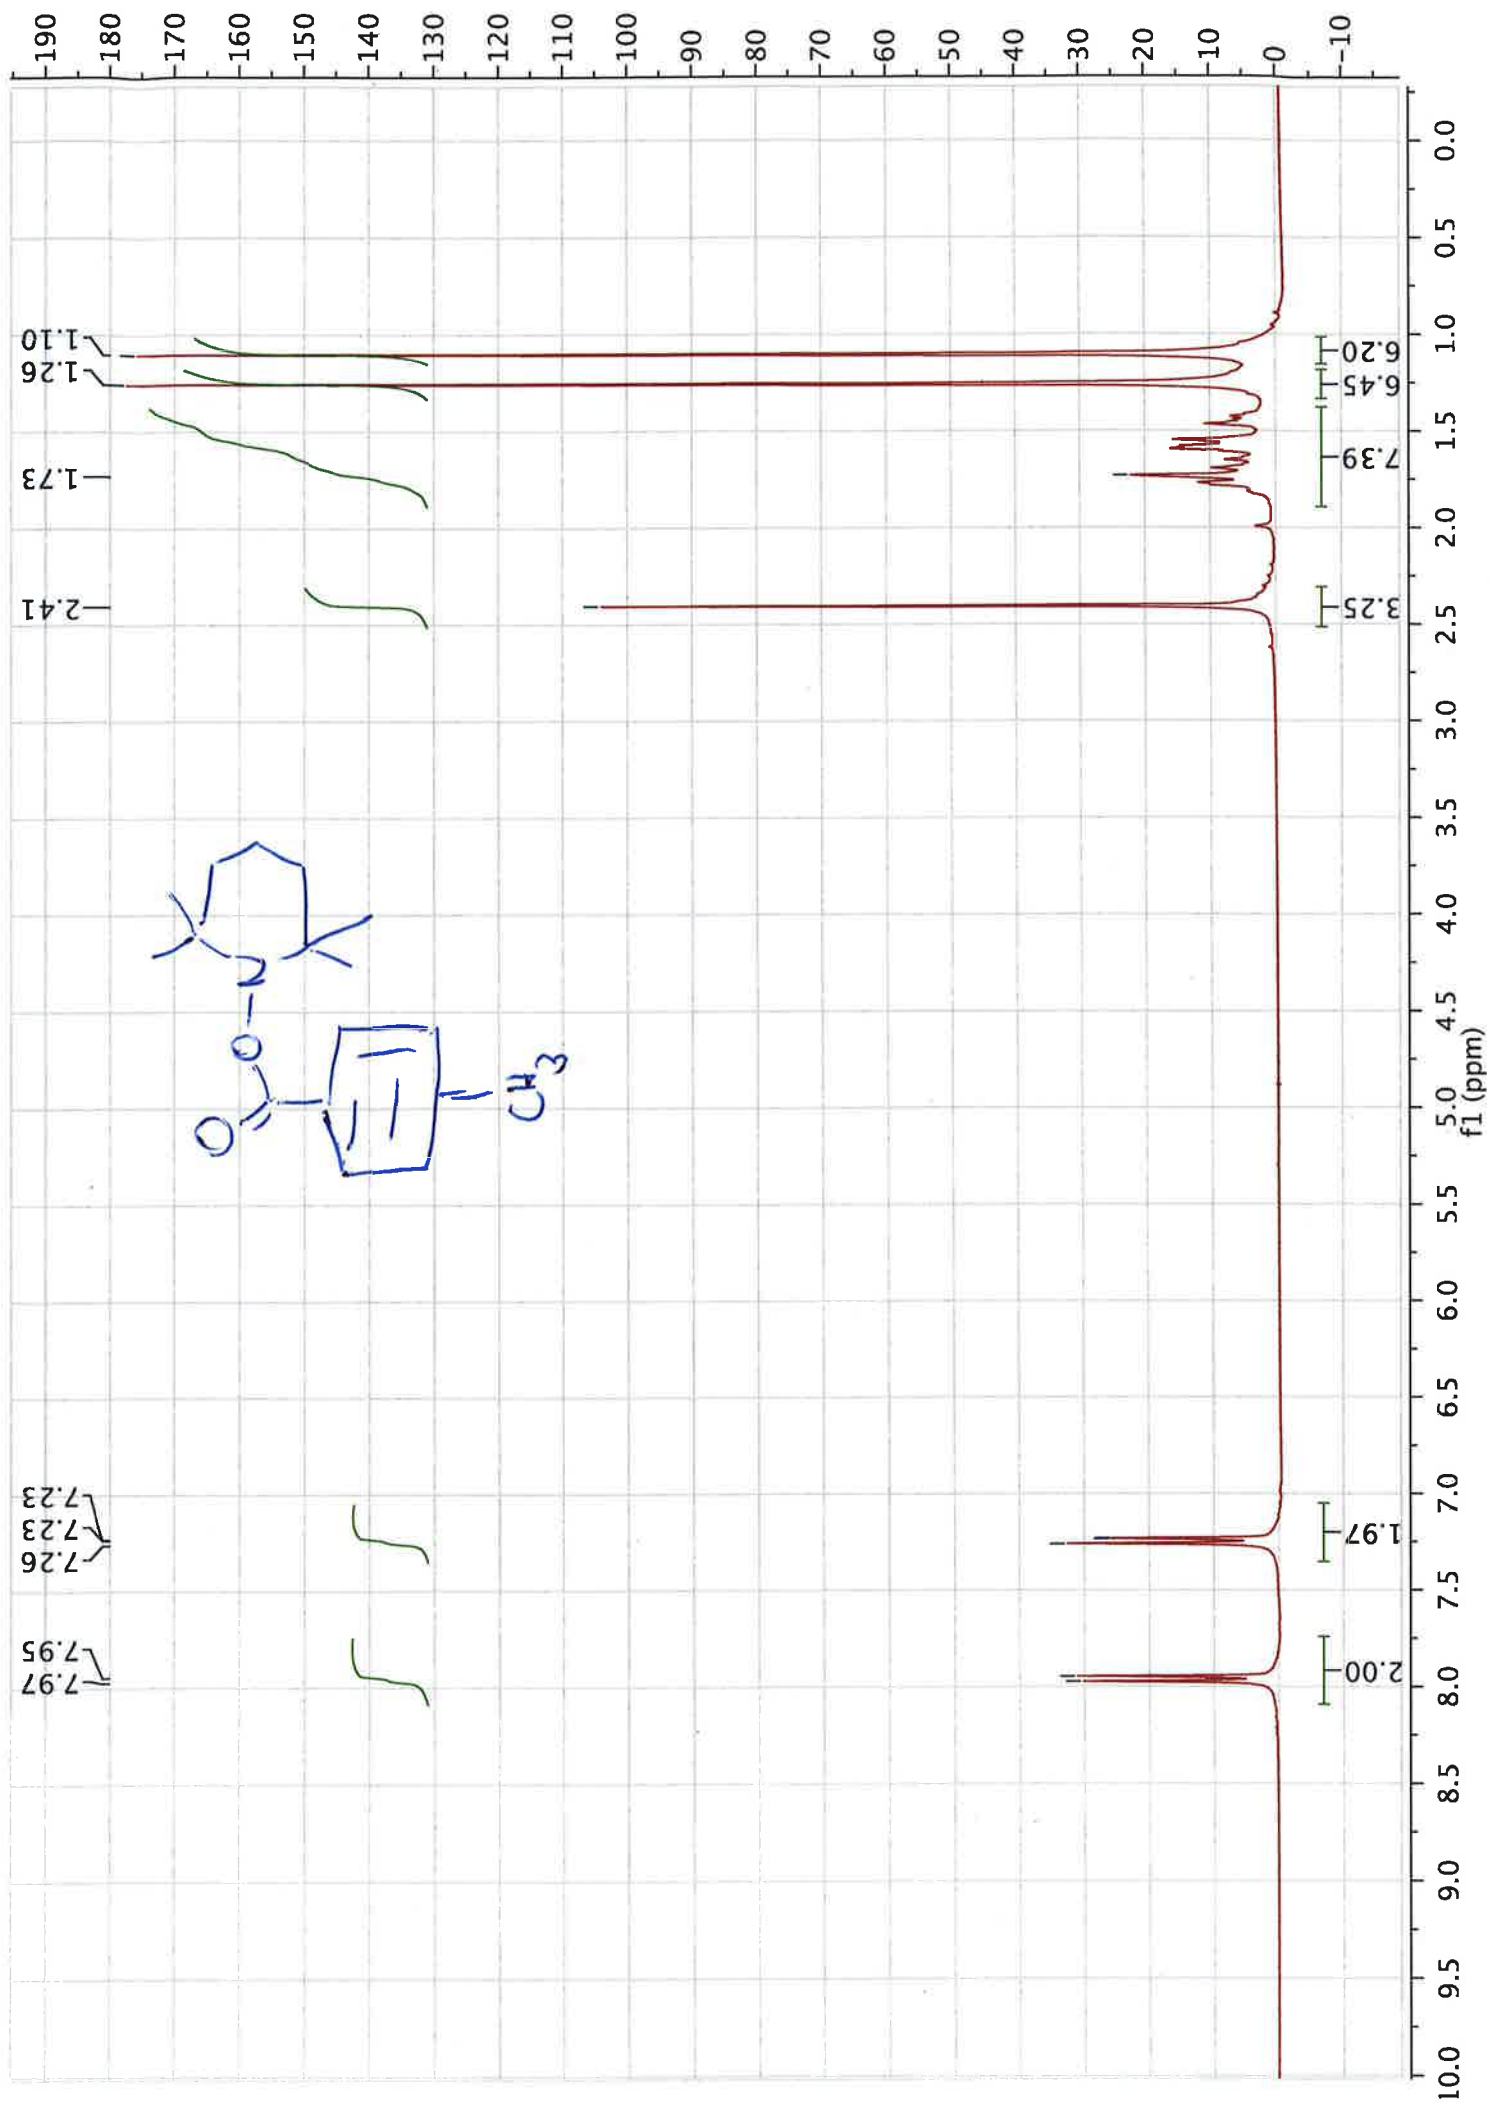

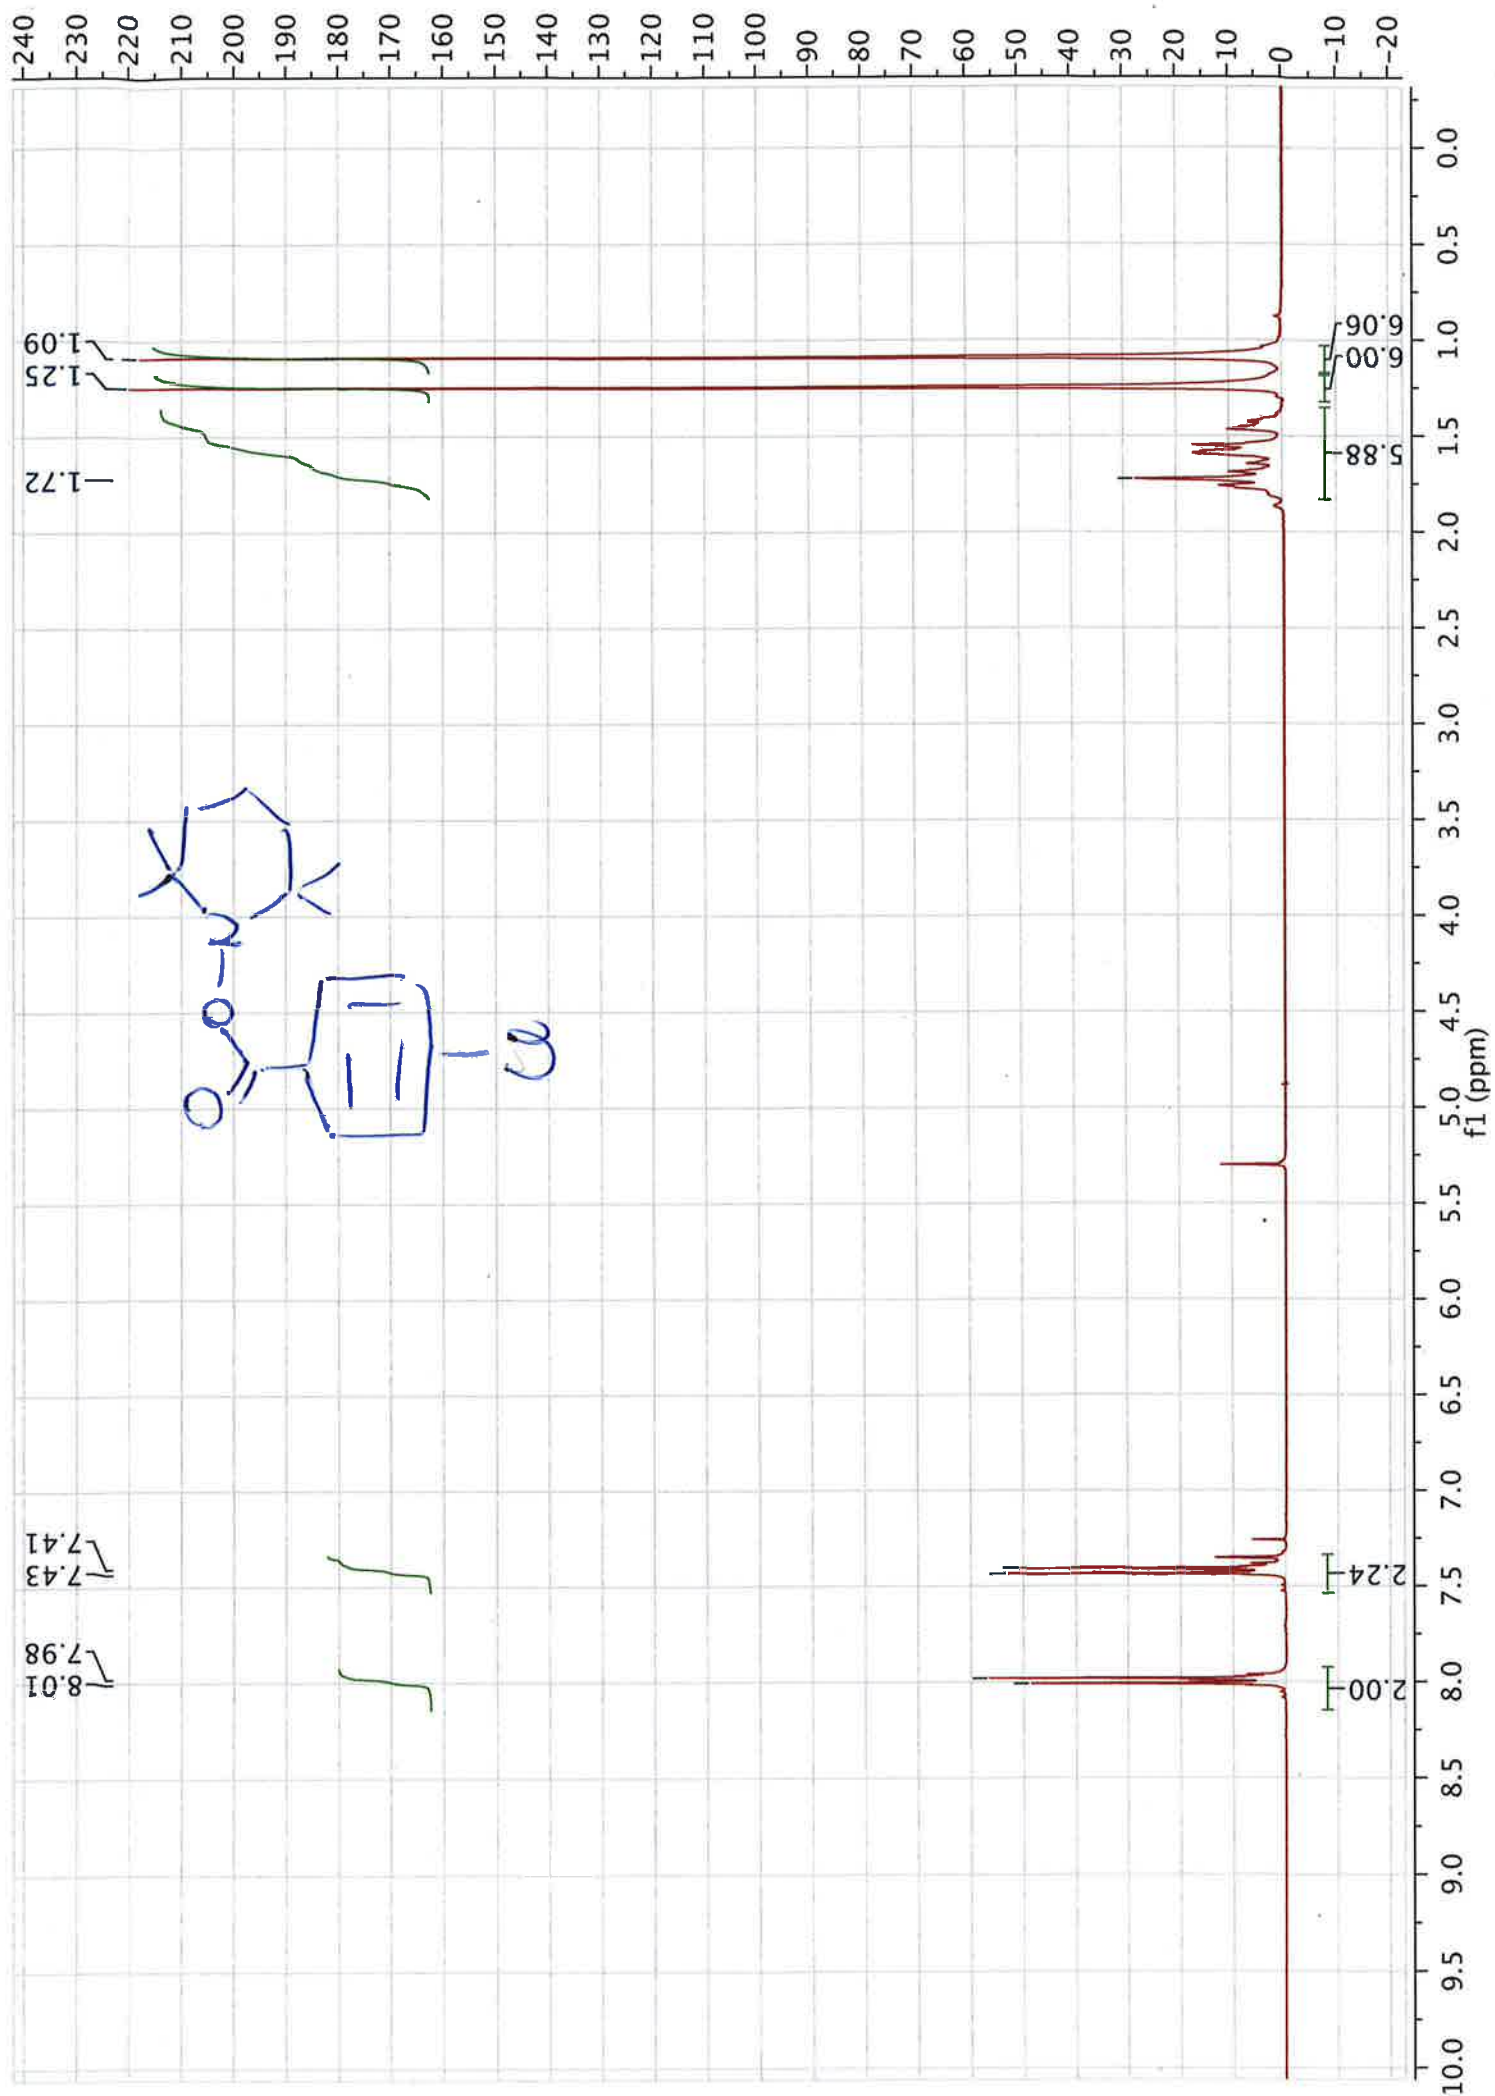

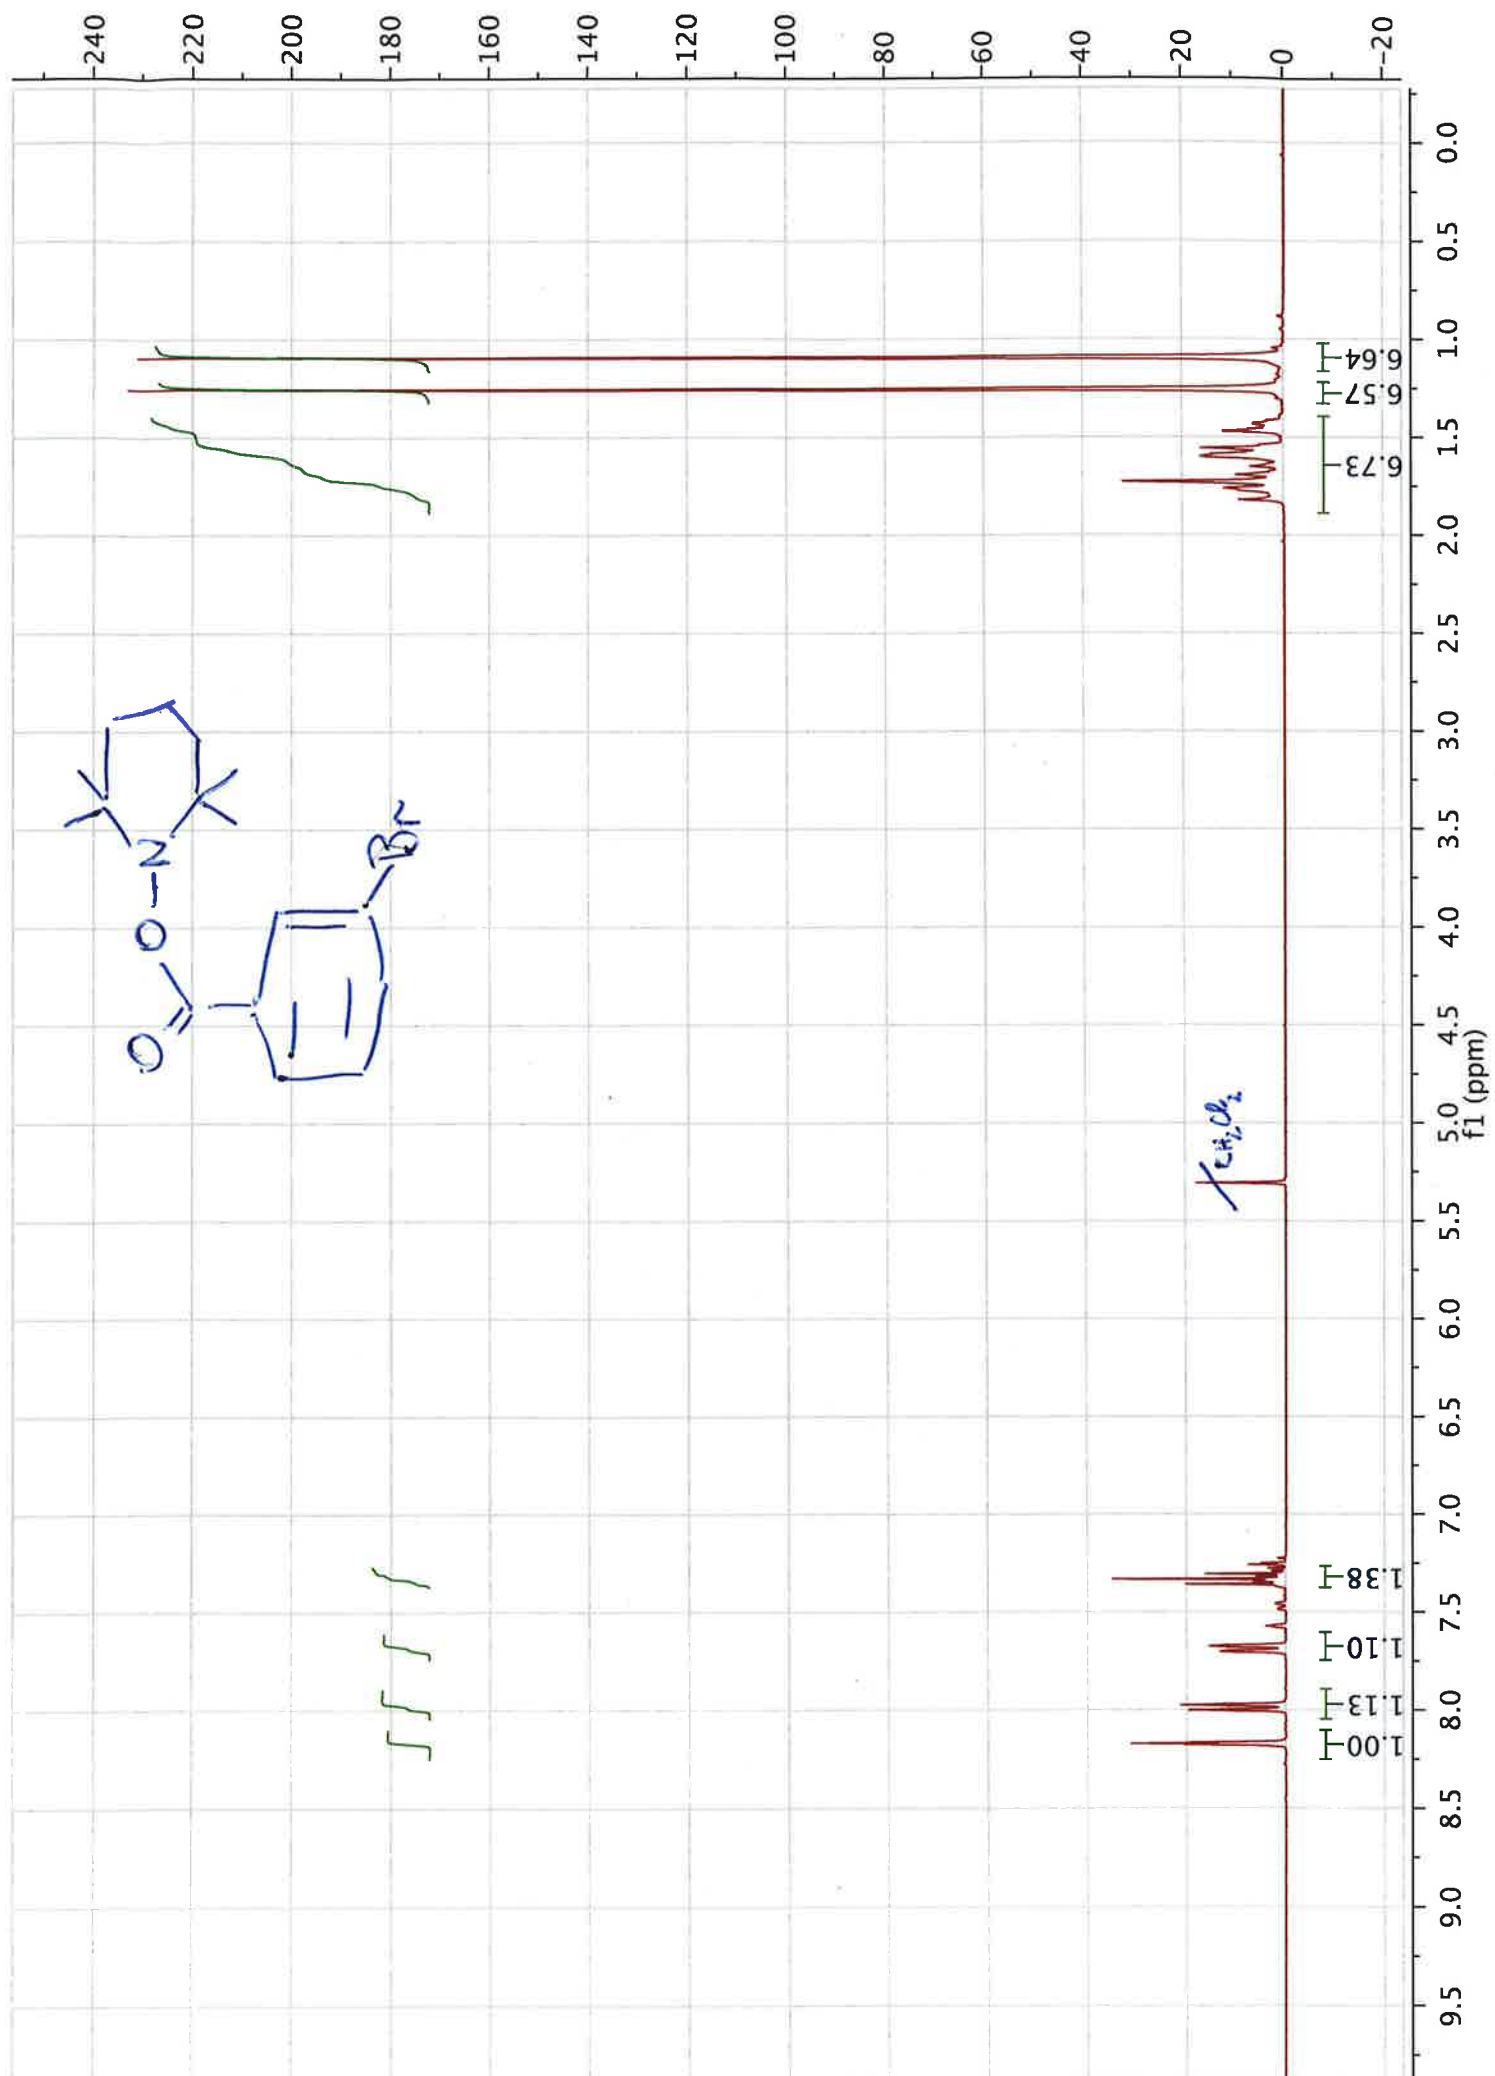

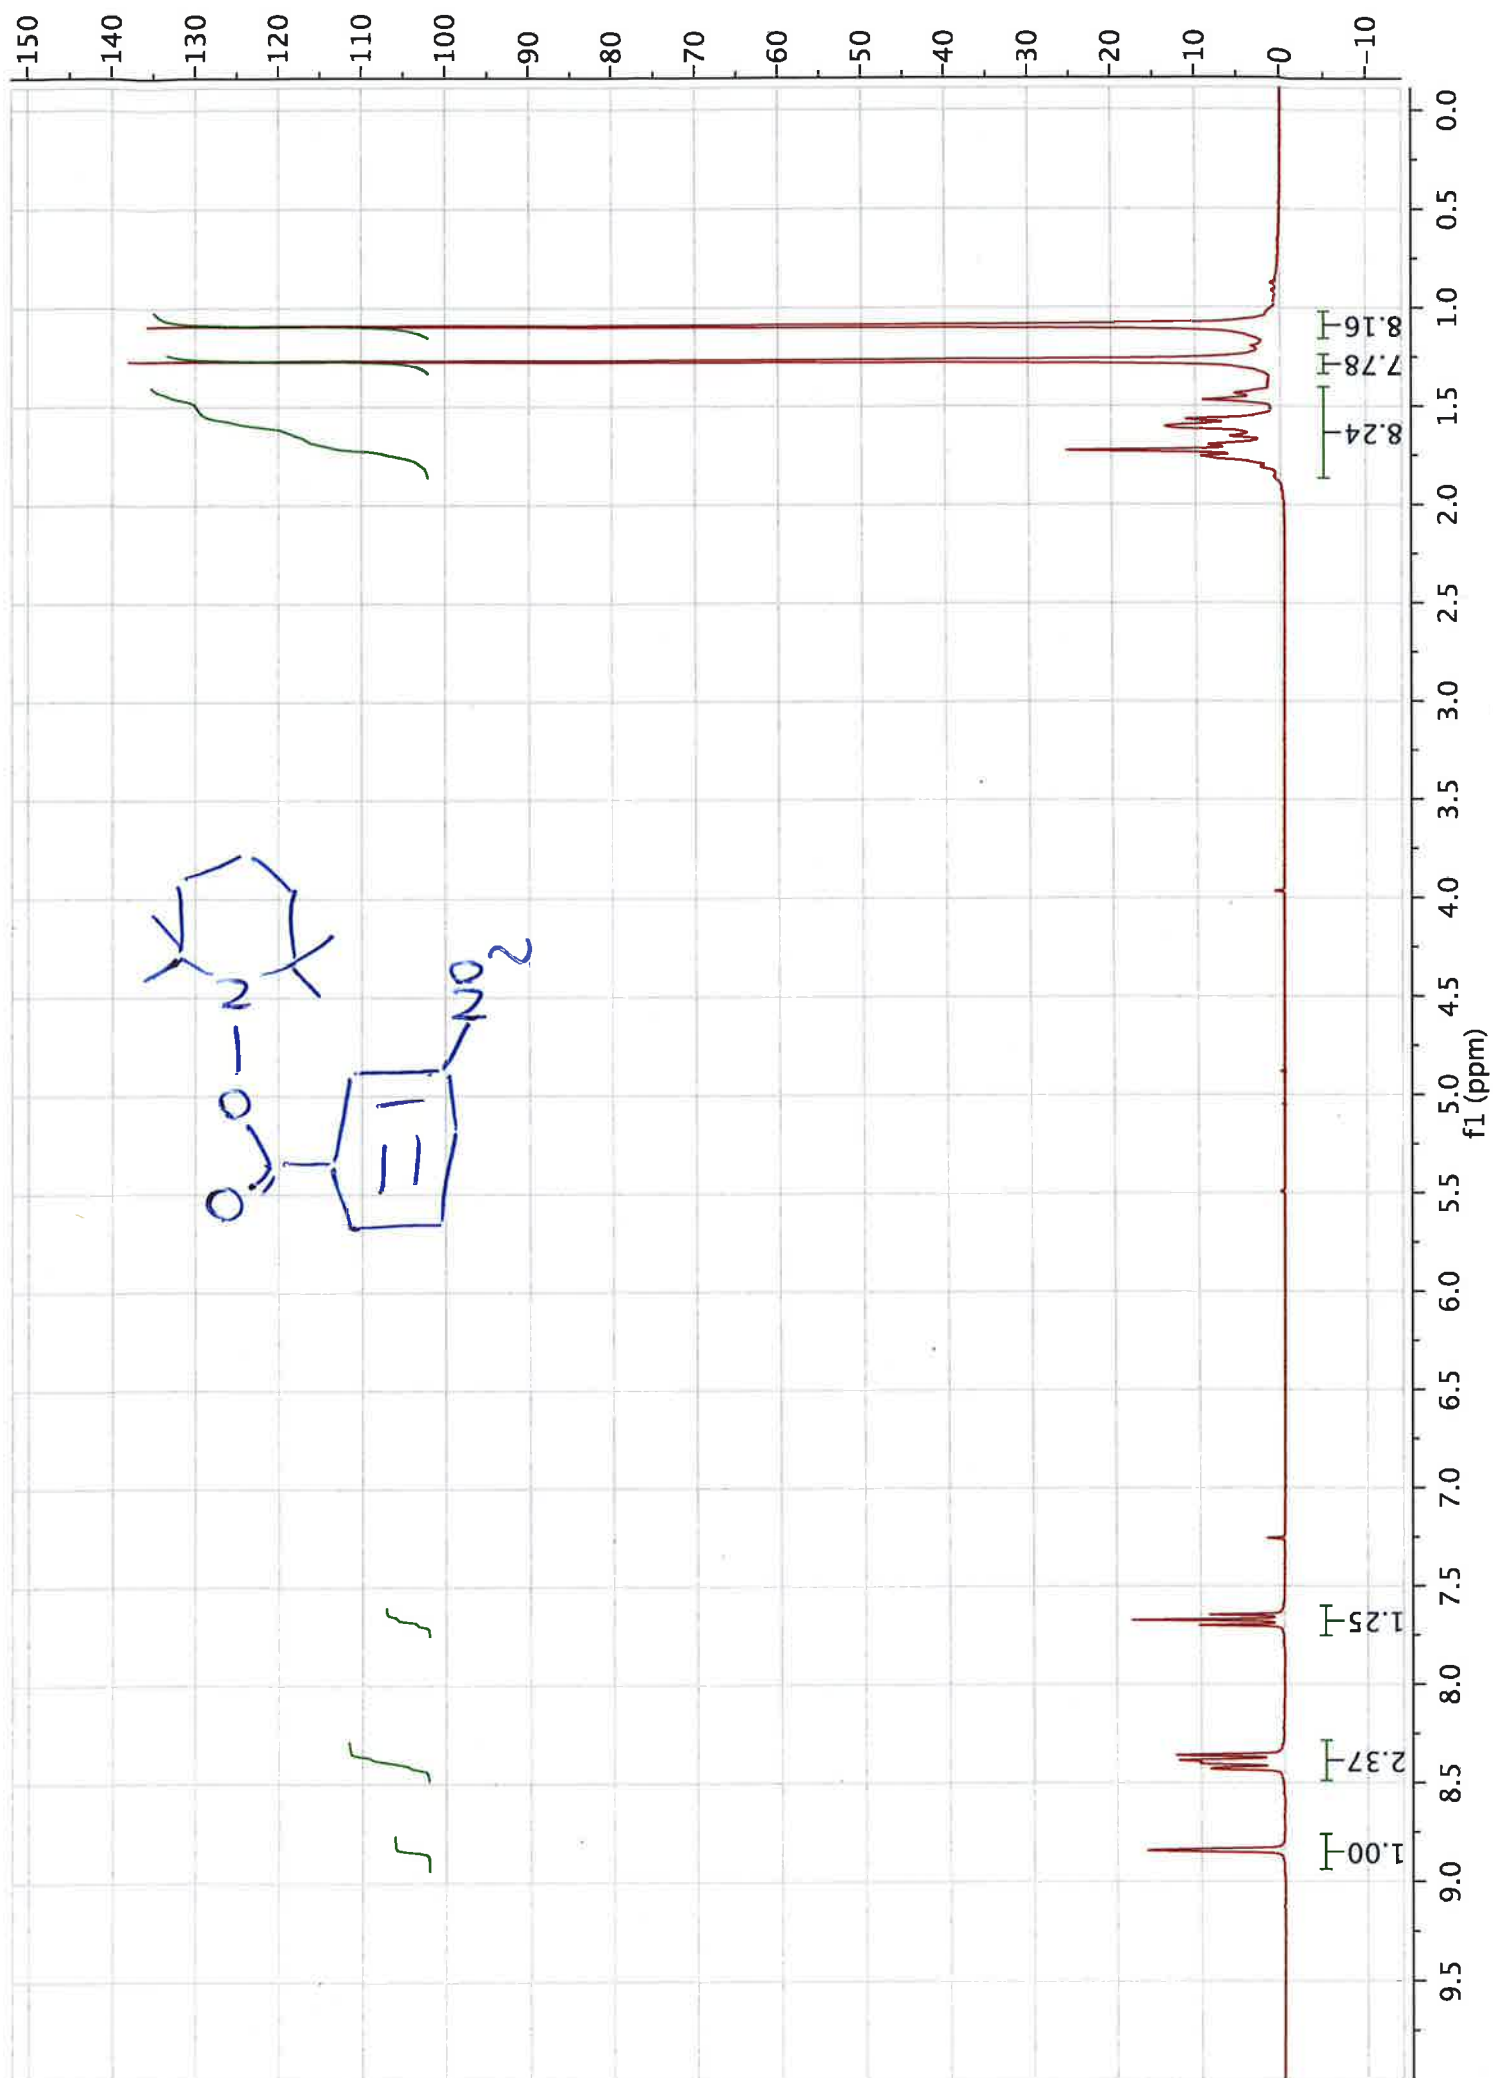

Supplement: c2ob26419f.pdf [file c2ob26419f.pdf]
